# Supplementary material
Source: ML conference proceedings conference paper supplement (https://openaccess.thecvf.com/content/ICCV_2019/html/Wang_Symmetric_Cross_Entropy_ICCV_2019_paper.html)
Supplement: Supplementary file 1 [file Wang_Symmetric_Cross_Entropy_ICCV_2019_supplemental.pdf]

## A. Proof for Theorem 1

**Theorem 1.** *In a multi-class classification problem,  $\ell_{rce}$  is noise tolerant under symmetric or uniform label noise if noise rate  $\eta < 1 - \frac{1}{K}$ . And, if  $R(f^*) = 0$ ,  $\ell_{rce}$  is also noise tolerant under asymmetric or class-dependent label noise when noise rate  $\eta_{yk} < 1 - \eta_y$  with  $\sum_{k \neq y} \eta_{yk} = \eta_y$ .*

*Proof.* For symmetric noise:

$$\begin{aligned} R^\eta(f) &= \mathbb{E}_{\mathbf{x}, \hat{y}} \ell_{rce}(f(\mathbf{x}), \hat{y}) = \mathbb{E}_{\mathbf{x}} \mathbb{E}_{y|\mathbf{x}} \mathbb{E}_{\hat{y}|\mathbf{x}, y} \ell_{rce}(f(\mathbf{x}), \hat{y}) \\ &= \mathbb{E}_{\mathbf{x}} \mathbb{E}_{y|\mathbf{x}} \left[ (1 - \eta) \ell_{rce}(f(\mathbf{x}), y) + \frac{\eta}{K-1} \sum_{k \neq y} \ell_{rce}(f(\mathbf{x}), k) \right] \\ &= (1 - \eta) R(f) + \frac{\eta}{K-1} \left( \mathbb{E}_{\mathbf{x}, y} \left[ \sum_{k=1}^K \ell_{rce}(f(\mathbf{x}), k) \right] - R(f) \right) \\ &= R(f) \left( 1 - \frac{\eta K}{K-1} \right) - A \eta, \end{aligned}$$

where the last equality holds due to  $\sum_{k=1}^K \ell_{rce}(f(\mathbf{x}), k) = -(K-1)A$  following Eq. (5) and the definition of  $\log 0 = A$  (a negative constant). Thus,

$$R^\eta(f^*) - R^\eta(f) = \left( 1 - \frac{\eta K}{K-1} \right) (R(f^*) - R(f)) \leq 0,$$

because  $\eta < 1 - \frac{1}{K}$  and  $f^*$  is a global minimizer of  $R(f)$ . This proves  $f^*$  is also the global minimizer of risk  $R^\eta(f)$ , that is,  $\ell_{rce}$  is noise tolerant.

For asymmetric or class-dependent noise,  $1 - \eta_y$  is the probability of a label being correct (*i.e.*,  $k = y$ ), and the noise condition  $\eta_{yk} < 1 - \eta_y$  generally states that a sample  $\mathbf{x}$  still has the highest probability of being in the correct class  $y$ , though it has probability of  $\eta_{yk}$  being in an arbitrary noisy (incorrect) class  $k \neq y$ . Considering the noise transition matrix between classes  $[\eta_{ij}]$ ,  $\forall i, j \in \{1, 2, \dots, K\}$ , this condition only requires that the matrix is diagonal dominated by  $\eta_{ii}$  (*i.e.*, the correct class probability  $1 - \eta_y$ ). Following the symmetric case, here we have,

$$\begin{aligned} R^\eta(f) &= \mathbb{E}_{\mathbf{x}, \hat{y}} \ell_{rce}(f(\mathbf{x}), \hat{y}) = \mathbb{E}_{\mathbf{x}} \mathbb{E}_{y|\mathbf{x}} \mathbb{E}_{\hat{y}|\mathbf{x}, y} \ell_{rce}(f(\mathbf{x}), \hat{y}) \\ &= \mathbb{E}_{\mathbf{x}} \mathbb{E}_{y|\mathbf{x}} \left[ (1 - \eta_y) \ell_{rce}(f(\mathbf{x}), y) + \sum_{k \neq y} \eta_{yk} \ell_{rce}(f(\mathbf{x}), k) \right] \\ &= \mathbb{E}_{\mathbf{x}, y} \left[ (1 - \eta_y) \left( \sum_{k=1}^K \ell_{rce}(f(\mathbf{x}), k) - \sum_{k \neq y} \ell_{rce}(f(\mathbf{x}), k) \right) \right] + \mathbb{E}_{\mathbf{x}, y} \left[ \sum_{k \neq y} \eta_{yk} \ell_{rce}(f(\mathbf{x}), k) \right] \\ &= \mathbb{E}_{\mathbf{x}, y} \left[ (1 - \eta_y) \left( -(K-1)A - \sum_{k \neq y} \ell_{rce}(f(\mathbf{x}), k) \right) \right] + \mathbb{E}_{\mathbf{x}, y} \left[ \sum_{k \neq y} \eta_{yk} \ell_{rce}(f(\mathbf{x}), k) \right] \\ &= -(K-1)A \mathbb{E}_{\mathbf{x}, y} (1 - \eta_y) - \mathbb{E}_{\mathbf{x}, y} \left[ \sum_{k \neq y} (1 - \eta_y - \eta_{yk}) \ell_{rce}(f(\mathbf{x}), k) \right]. \end{aligned} \tag{12}$$

As  $f_\eta^*$  is the minimizer of  $R^\eta(f)$ ,  $R^\eta(f_\eta^*) - R^\eta(f^*) \leq 0$ . So, from Eq. (12), we have,

$$\mathbb{E}_{\mathbf{x}, y} \left[ \sum_{k \neq y} (1 - \eta_y - \eta_{yk}) \left( \underbrace{\ell_{rce}(f_\eta^*(\mathbf{x}), k)}_{\ell_{rce}^*} - \underbrace{\ell_{rce}(f^*(\mathbf{x}), k)}_{\ell_{rce}^\eta} \right) \right] \leq 0. \tag{13}$$

Next, we prove,  $f_\eta^* = f^*$  holds following Eq. (13). First,  $(1 - \eta_y - \eta_{yk}) > 0$  as per the assumption that  $\eta_{yk} < 1 - \eta_y$ . Since we are given  $R(f^*) = 0$ , we have  $\ell_{rce}(f^*(\mathbf{x}), k) = -A$  for all  $k \neq y$ . Also, by the definition of  $\ell_{rce}^\eta$ , we have  $\ell_{rce}(f_\eta^*(\mathbf{x}), k) = -A(1 - p_k) \leq -A$ ,  $\forall k \neq y$ . Thus, for Eq. (13) to hold (*e.g.*  $\ell_{rce}(f_\eta^*(\mathbf{x}), k) \geq \ell_{rce}(f^*(\mathbf{x}), k)$ ), it must be the case that  $p_k = 0$ ,  $\forall k \neq y$ , that is,  $\ell_{rce}(f_\eta^*(\mathbf{x}), k) = \ell_{rce}(f^*(\mathbf{x}), k)$  for all  $k \in \{1, 2, \dots, K\}$ , thus  $f_\eta^* = f^*$  which completes the proof. ■

## B. Gradient Derivation of SL

The complete derivartion of the simplified SL ( $\alpha, \beta = 1$ ) with respect to the logits is as follows:

$$\frac{\partial \ell_{sl}}{\partial z_j} = - \sum_{k=1}^K q_k \frac{1}{p_k} \frac{\partial p_k}{\partial z_j} - \sum_{k=1}^K \frac{\partial p_k}{\partial z_j} \log q_k, \tag{14}$$

where

$$\frac{\partial p_k}{\partial z_j} = \frac{\partial \left( \frac{e^{z_k}}{\sum_{j=1}^K e^{z_j}} \right)}{\partial z_j} = \frac{\frac{\partial e^{z_k}}{\partial z_j} (\sum_{j=1}^K e^{z_j}) - e^{z_k} \frac{\partial (\sum_{j=1}^K e^{z_j})}{\partial z_j}}{(\sum_{j=1}^K e^{z_j})^2}. \quad (15)$$

In the case of  $k = j$ :

$$\begin{aligned} \frac{\partial p_k}{\partial z_j} &= \frac{\partial p_k}{\partial z_k} = \frac{e^{z_k} (\sum_{k=1}^K e^{z_k}) - (e^{z_k})^2}{(\sum_{k=1}^K e^{z_k})^2} \\ &= \frac{e^{z_k}}{\sum_{k=1}^K e^{z_k}} - \left( \frac{e^{z_k}}{\sum_{k=1}^K e^{z_k}} \right)^2 \\ &= p_k - p_k^2 = p_k(1 - p_k); \end{aligned} \quad (16)$$

In the case of  $k \neq j$ :

$$\begin{aligned} \frac{\partial p_k}{\partial z_j} &= \frac{0 \cdot (\sum_{j=1}^K e^{z_j}) - e^{z_k} e^{z_j}}{(\sum_{j=1}^K e^{z_j})(\sum_{j=1}^K e^{z_j})} \\ &= -\frac{e^{z_k}}{\sum_{j=1}^K e^{z_j}} \frac{e^{z_j}}{\sum_{j=1}^K e^{z_j}} \\ &= -p_k p_j. \end{aligned} \quad (17)$$

Combining Eq. (16) and (17) into Eq. (14), we can obtain:

$$\begin{aligned} \frac{\partial \ell_{sl}}{\partial z_j} &= -\sum_{k=1}^K q_k \frac{1}{p_k} \frac{\partial p_k}{\partial z_j} - \sum_{k=1}^K \frac{\partial p_k}{\partial z_j} \log q_k \\ &= -\sum_{k \neq j}^K \frac{q_k}{p_k} (-p_j p_k) - \frac{q_j}{p_j} (p_j(1 - p_j)) - \sum_{k \neq j}^K (-p_j p_k) \log q_k - p_j(1 - p_j) \log q_j \\ &= p_j - q_j + p_j \left( \sum_{k=1}^K p_k \log q_k - \log q_j \right). \end{aligned} \quad (18)$$

If  $q_j = q_y = 1$ , then the gradient of SL is:

$$\begin{aligned} \frac{\partial \ell_{sl}}{\partial z_j} &= p_j - q_j + p_j \left( \sum_{k=1}^K p_k \log q_k - \log q_j \right) \\ &= (p_j - 1) + p_j((1 - p_j)A - 0) \\ &= \frac{\partial \ell_{ce}}{\partial z_j} - (Ap_j^2 - Ap_j). \end{aligned} \quad (19)$$

Else if  $q_j = 0$ , then

$$\begin{aligned} \frac{\partial \ell_{sl}}{\partial z_j} &= p_j - q_j + p_j \left( \sum_{k=1}^K p_k \log q_k - \log q_j \right) \\ &= p_j + p_j((1 - p_y)A - A) \\ &= \frac{\partial \ell_{ce}}{\partial z_j} - Ap_j p_y. \end{aligned} \quad (20)$$
